# Supplementary material for: A Dual Biomarker TK1 Protein and CA125 or HE4-Based Algorithm as a Better Diagnostic Tool than ROMA Index in Early Detection of Ovarian Cancer
Source: MDPI journal article supplement (doi:10.3390/cancers15051593), 2023-03-03
Supplement: s1 [file s1]

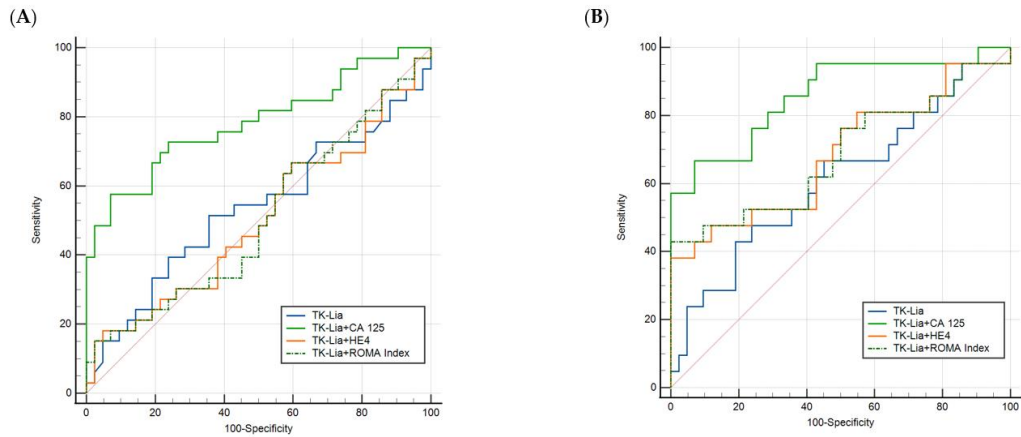

**Figure S1. (A,B).** Roc curves for TK-Liaison assay in combination with other biomarkers in the differentiation of premenopausal benign and malignant from controls.

**Table S1.** ROC curve analysis for TK-Liaison assay in combination with other biomarkers in the differentiation of premenopausal benign and malignant from controls.

| <b>Premenopausal</b>  |         |       |             |             |      |      |
|-----------------------|---------|-------|-------------|-------------|------|------|
| Benign vs controls    | Cut-off | AUC   | Sensitivity | Specificity | PPV  | NPV  |
| TK-Liaison            | 9.2     | 0.533 | 15.2        | 95.2        | 71.4 | 58.8 |
| TK-Lia+ CA 125        | 0.68    | 0.784 | 48.5        | 97.6        | 94.1 | 70.7 |
| TK-Lia+HE4            | 0.47    | 0.503 | 18.2        | 95.2        | 75.0 | 59.7 |
| TK-Lia+ROMA Index     | 0.51    | 0.504 | 15.1        | 97.6        | 83.3 | 59.4 |
| Malignant vs controls |         |       |             |             |      |      |
| TK-Liaison            | 9.2     | 0.61  | 23.8        | 95.2        | 71.4 | 71.4 |
| TK-Lia+ CA 125        | 0.64    | 0.858 | 57.1        | 100         | 100  | 82.4 |
| TK-Lia+HE4            | 0.48    | 0.685 | 38.2        | 100         | 100  | 76.4 |
| TK-Lia+ROMA Index     | 0.49    | 0.685 | 42.8        | 100         | 100  | 77.8 |
